# Supplementary material for: CCR9 Is a Key Regulator of Early Phases of Allergic Airway Inflammation
Source: Hindawi journal article supplement (doi:10.1155/2016/3635809), 2016-01-01
Supplement: f1 [file 3635809.f1.pdf]

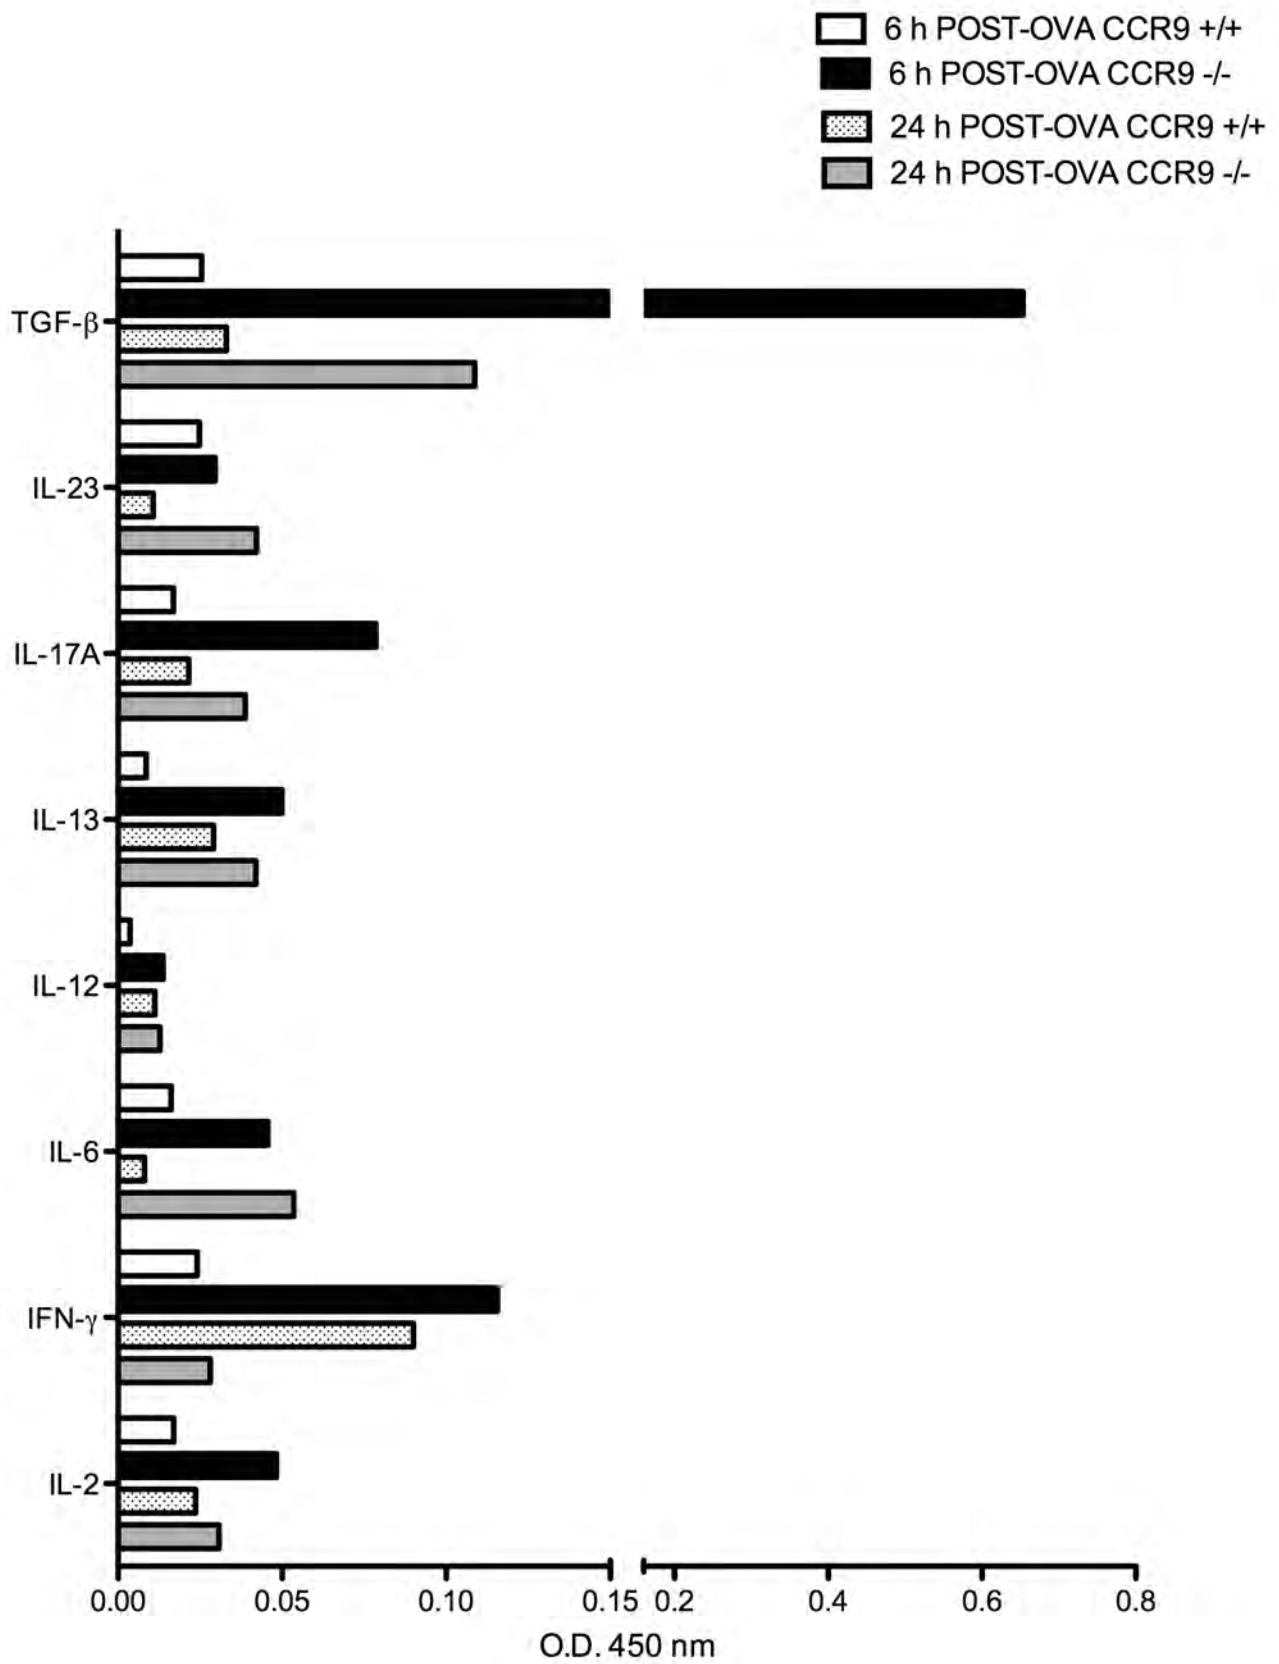

FIGURE S1

SS

6 h

24 h

Goat IgG  
Isotype

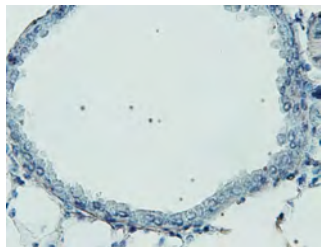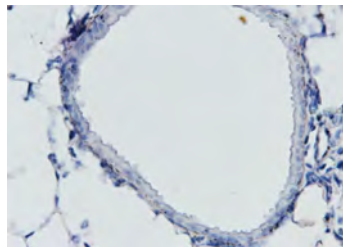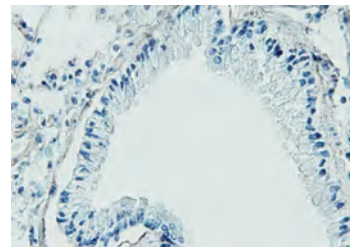

CCR9 +/+

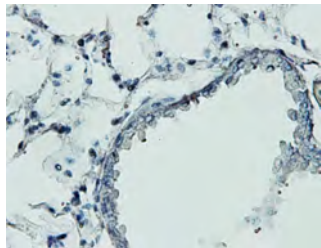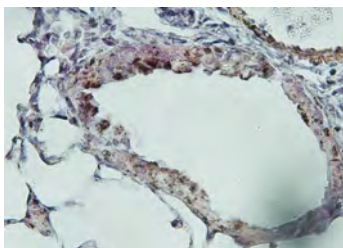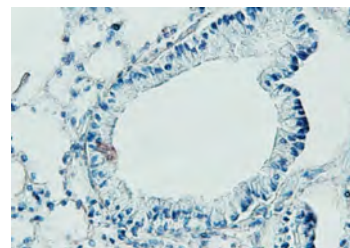

CCR9 -/-

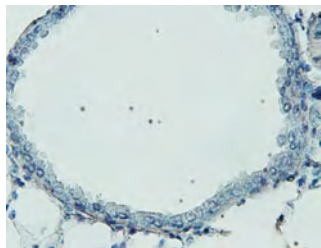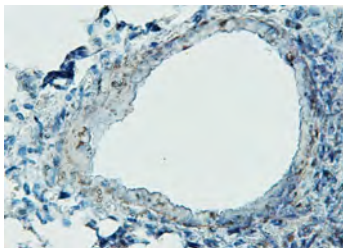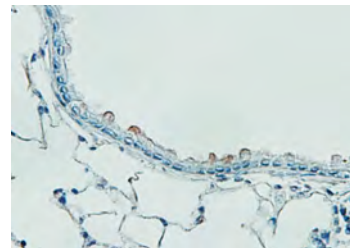

FIGURE S2

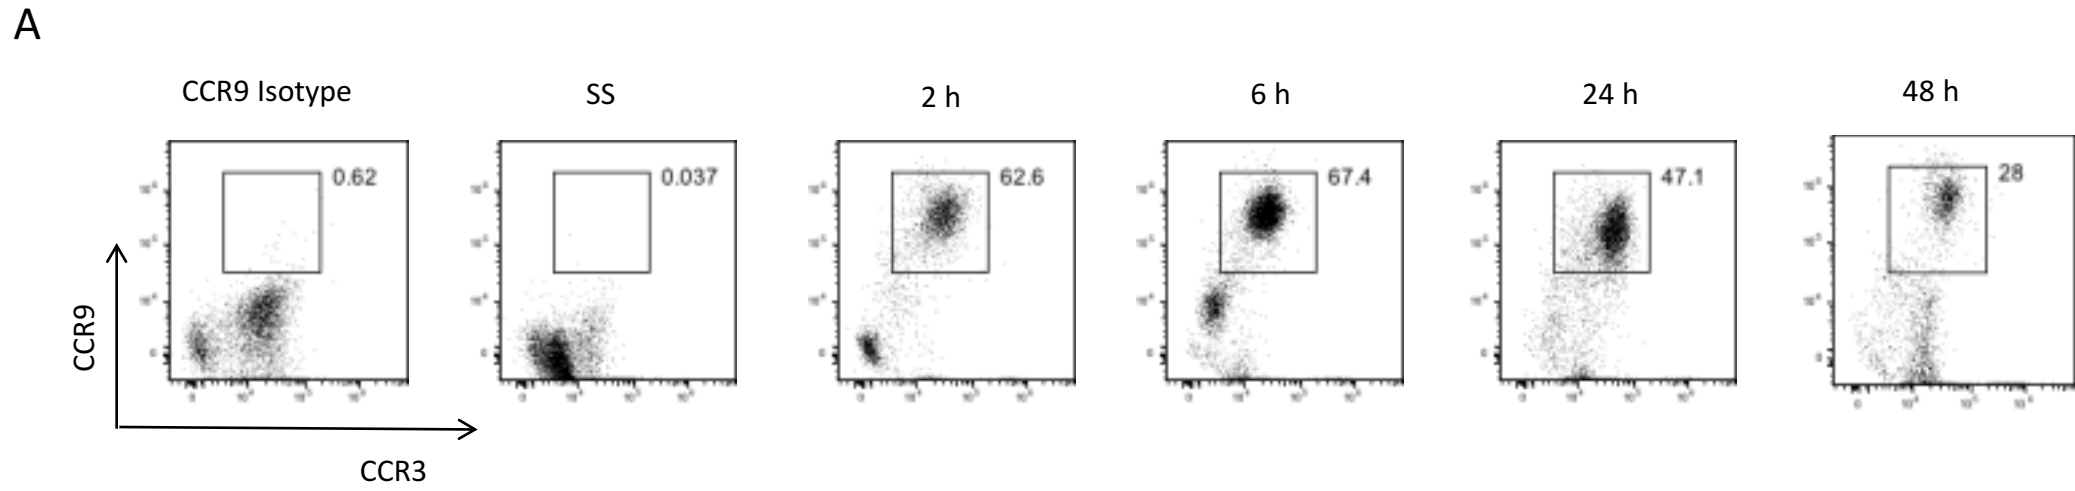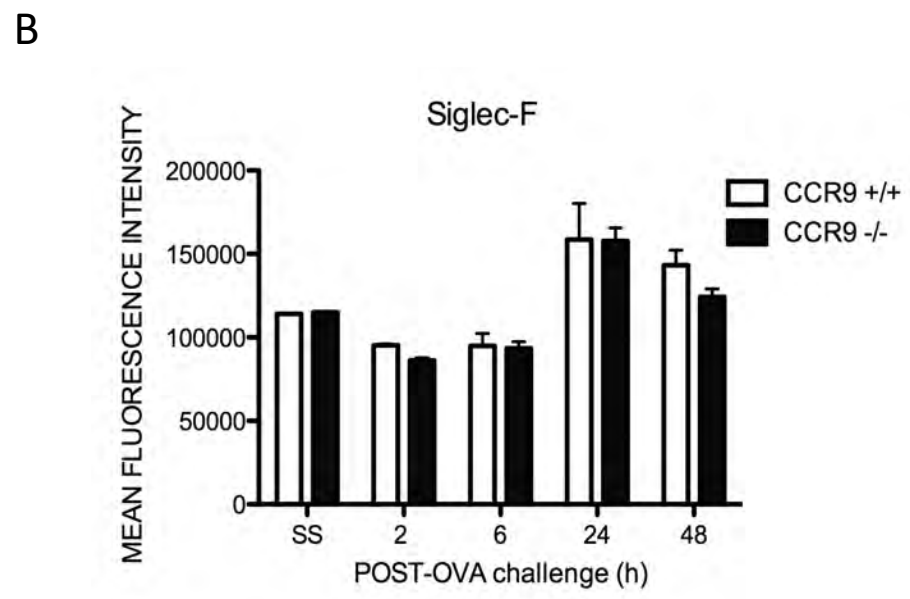

FIGURE S3
